# Supplementary material
Source: PubMed Central journal article supplement (PMC6774838)

**Supplemental Table 1. *In utero* nucleoside reverse transcriptase inhibitors exposure among infants who were exposed to zidovudine-containing antiretroviral therapy *in utero* (N=94).**

| <i>In utero</i> NRTIs exposure | Number of infants<br>(N=94) | %    |
|--------------------------------|-----------------------------|------|
| ZDV, 3TC                       | 48                          | 51.1 |
| ZDV, 3TC, FTC, TDF             | 20                          | 21.3 |
| ZDV, 3TC, ABC                  | 13                          | 13.8 |
| ZDV, FTC, TDF                  | 6                           | 6.4  |
| ZDV, 3TC, ABC, TDF             | 3                           | 3.2  |
| ZDV                            | 2                           | 2.1  |
| ZDV, 3TC, ABC, FTC, TDF        | 1                           | 1.1  |
| ZDV, TDF                       | 1                           | 1.1  |

**Abbreviations:** NRTIs: nucleoside reverse transcriptase inhibitors; ZDV: zidovudine; 3TC: lamivudine; FTC: emtricitabine; TDF: tenofovir; ABC: abacavir

**Supplemental Figure 1. Association between relative telomere length at birth and duration of ZDV exposure *in utero*.**

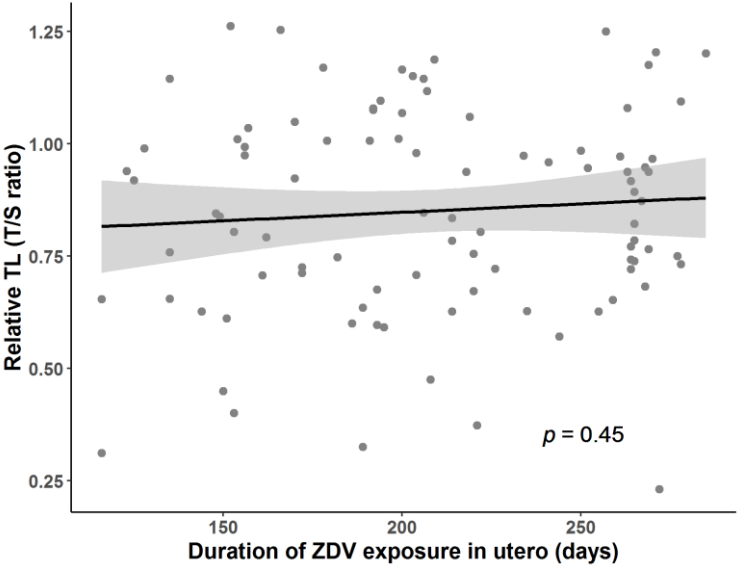

**Supplemental Figure 2. Associations between relative telomere length at birth and exposure to different antiretroviral therapy regimens *in utero*.**

A. ZDV and PIs *versus* ZDV without PIs

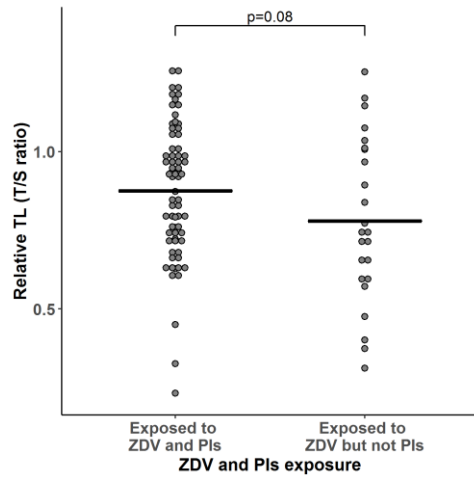

B. ZDV and NNRTIs *versus* ZDV without NNRTIs

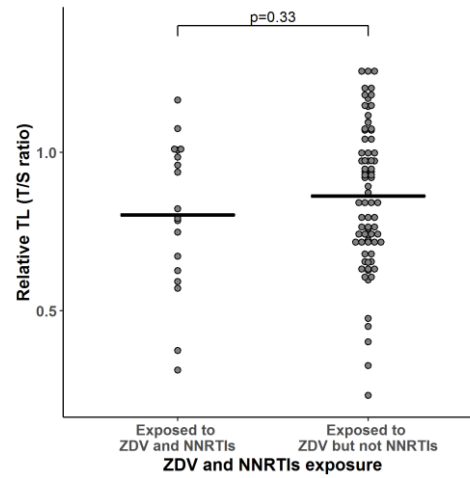

PIs: protease inhibitors

NNRTIs: non-nucleoside reverse transcriptase inhibitors

**Supplemental Figure 3. Associations between relative telomere length at birth and selected maternal and neonatal characteristics.**

A. Maternal CD4 count during pregnancy

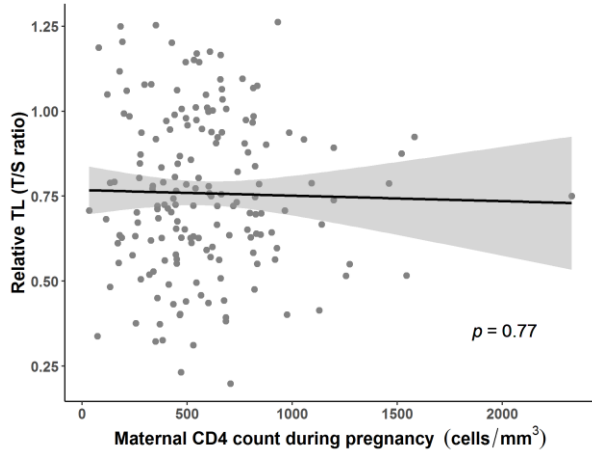

B. Maternal age at delivery

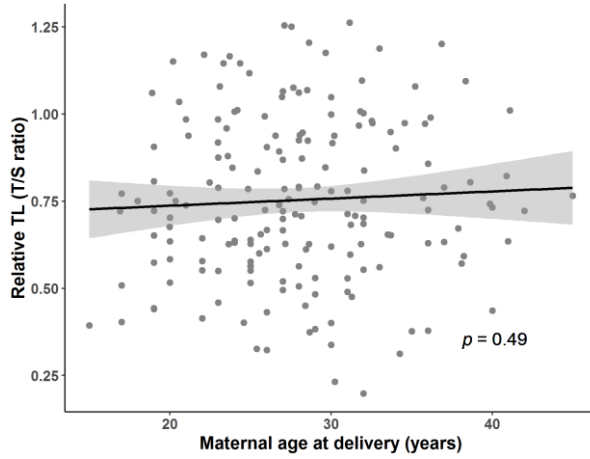

C. Gestational age

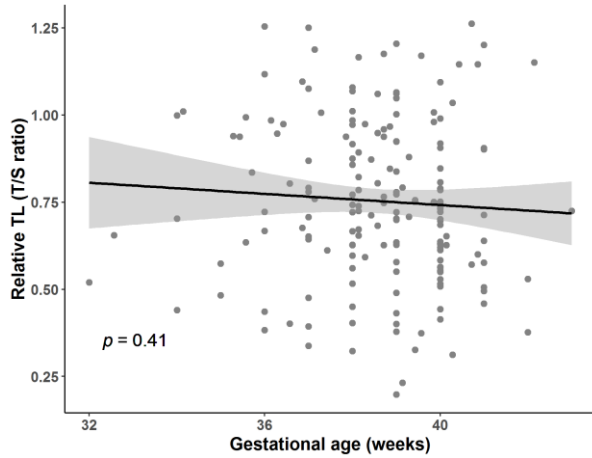

D. Sample storage time

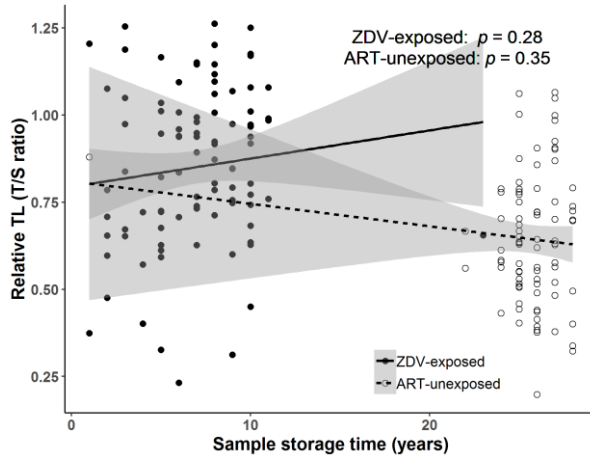

E. Infant's sex

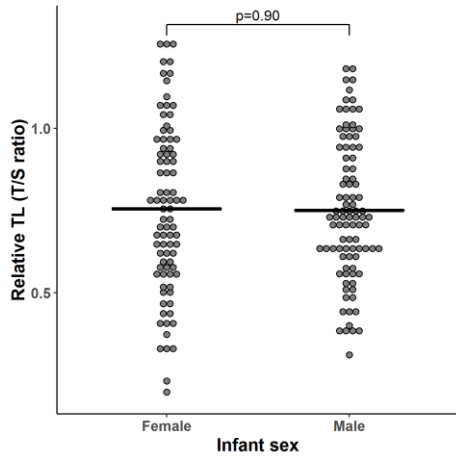

F. Maternal tobacco use status

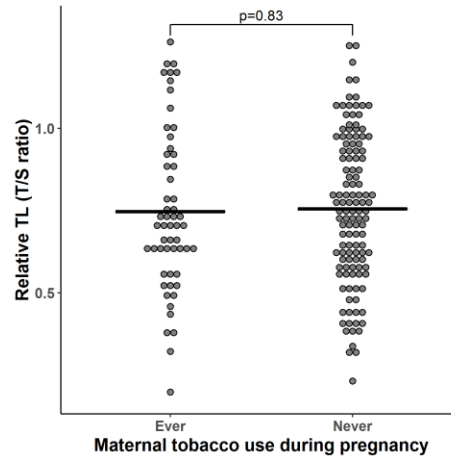

G. Maternal alcohol consumption

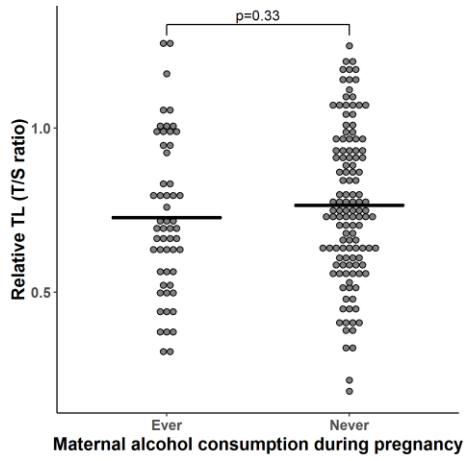

H. Maternal marijuana use status

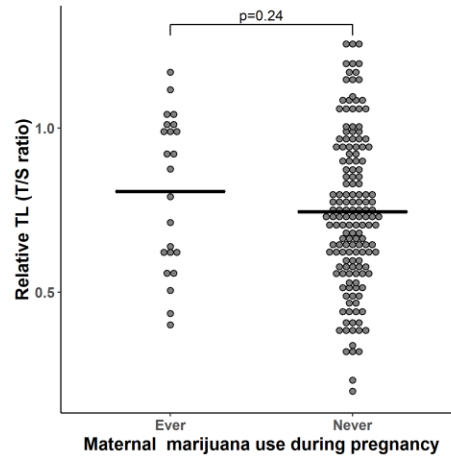

Supplement: NIHMS1536833-supplement-1.pdf [file NIHMS1536833-supplement-1.pdf]
